# Supplementary material for: Toll-like receptor 7 governs interferon and inflammatory responses to rhinovirus and is suppressed by IL-5-induced lung eosinophilia
Source: PubMed Central journal article supplement (PMC4552894; doi:10.1136/thoraxjnl-2014-205465), 2015-06-24

**Supplementary Figure 1. Expression of  $T_H2$ -priming epithelial cytokines IL-25 and TSLP but not IL-33 are higher in exacerbated TLR7-deficient mice.** Total RNA was extracted from lower airway tissue of mice following RV-induced exacerbation and expression of IL-25 (A), IL-33 (B), and thymic stromal lymphopoiectin (TSLP) (C) assessed by qRT-PCR. Copy numbers are displayed as % compared to WT HDM+UV group. Results are Mean $\pm$ SEM (n=3-6 mice per group). \*,  $P < 0.05$ , \*\*,  $P < 0.01$ , \*\*\*,  $P < 0.001$  as compared to strain-matched HDM+UV group or otherwise indicated as determined by students t-test.

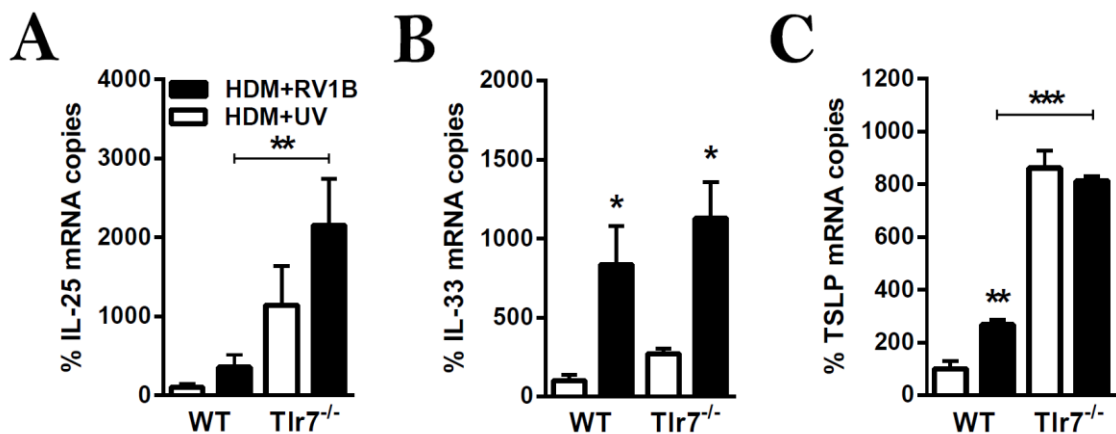

**Supplementary Figure 2. TLR7-deficiency leads to heightened local production of chemokines upon RV-induced exacerbation.** Lung protein levels of CCL2/MCP1, CCL3/MIP1 $\alpha$  and CCL4/MIP1 $\beta$  (A), as well as CXCL9/MIG and CXCL10/IP10 (B) was quantified by bead-based Multiplex Immunoassay in clarified tissue homogenates. (A) CCL7/MCP3 was quantified from the same tissue by sandwich ELISA. Results are Mean $\pm$ SEM (n=3-4 mice per group) with all protein concentrations normalised to lung weight. \*,  $P < 0.05$ , \*\*,  $P < 0.01$ , \*\*\*,  $P < 0.001$  as compared to strain-matched HDM+UV group or otherwise indicated as determined by students t-test.

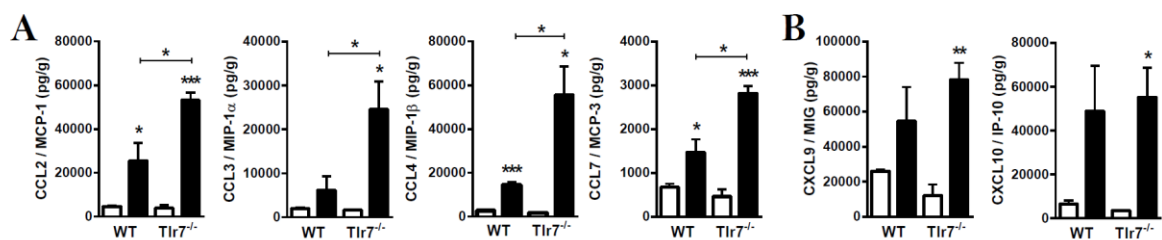

**Supplementary Figure 3. TLR7-deficiency does not alter IL-13 production or number of PAS-positive cells following exacerbation.** Levels of IL-13 protein and number of PAS<sup>+</sup> epithelial cells per 100 $\mu\text{m}^2$  of lung tissue, assessed by ELISA and histological analysis respectively. Data from experiments displayed in Figure 1 (A), Figure 2 (B), and Figure 3 (C). Results are Mean $\pm$ SEM (n=3-6 mice per group). \*,  $P < 0.05$ , \*\*,  $P < 0.01$ , \*\*\*,  $P < 0.001$  as compared to strain-matched HDM+UV group or otherwise indicated as determined by students t-test.

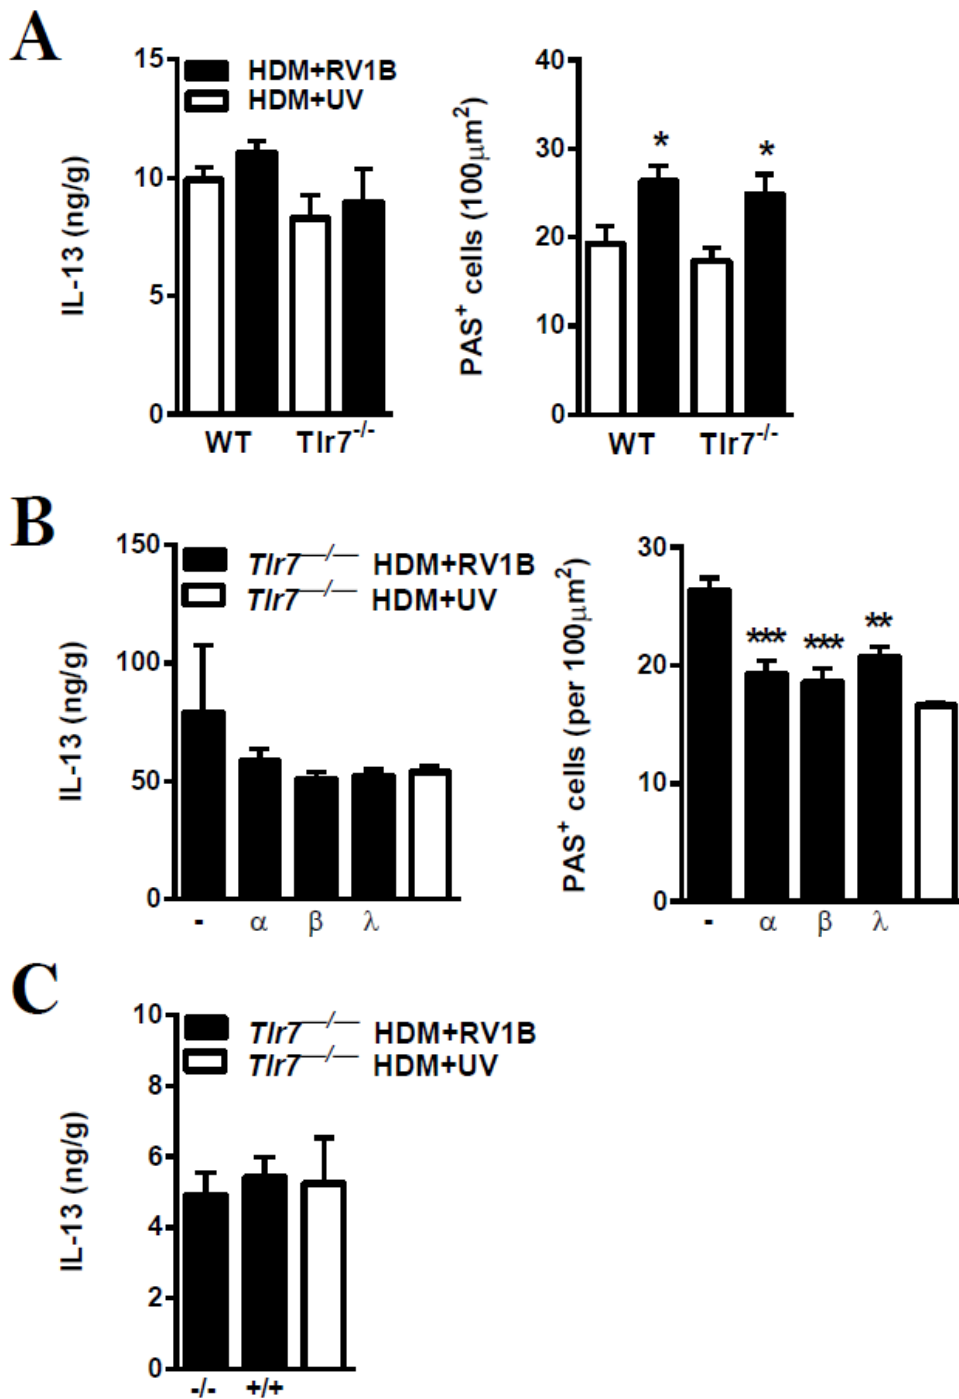

Supplement: thoraxjnl-2014-205465-s1.pdf [file thoraxjnl-2014-205465-s1.pdf]
