# Supplementary material for: Toll-like receptor 7 governs interferon and inflammatory responses to rhinovirus and is suppressed by IL-5-induced lung eosinophilia
Source: PubMed Central journal article supplement (PMC4552894; doi:10.1136/thoraxjnl-2014-205465), 2015-06-24
Supplement: thoraxjnl-2014-205465-s2.pdf [file thoraxjnl-2014-205465-s2.pdf]

**Supplementary Table 1.** Primer/probe sequences

| <b>Gene</b>          | <b>Forward primer (5'-3')</b> | <b>Reverse primer (3'-5')</b> |
|----------------------|-------------------------------|-------------------------------|
| Murine <i>HPRT</i>   | AGGCCAGACTTTGTTGGATTTGAA      | CAACTTGCCTCATCTTAGGCTTT       |
| Murine <i>IL25</i>   | ATGTACCAGGCTGTTGCATTCTTG      | CTAAGCCATGACCCGGGGCC          |
| Murine <i>IL33</i>   | TCCTTGCTTGCCAGTATCCA          | TGCTCAATGTGTCAACAGACG         |
| Murine <i>TSLP</i>   | AGGCTACCCTGAAACTGAG           | GGAGATTGCATGAAGGAATACC        |
| Murine <i>CCL11</i>  | TTCTATTCCCTGCTGCTCACGG        | AGGGTGCATCTGTTGTTGGIG         |
| Murine <i>TLR7</i>   | TCCCAACCTTGTTGAGTTGGATTT      | TGGGAAGCTTGTGCAATACAGAAA      |
| Human <i>GAPDH</i>   | ACAGICAGCCGCATCTTCTTTTG       | TAGGCTCTTCATTGGCTCAG          |
| Human <i>TLR7</i>    | TGGAAATTGCCCTCGTTGTT          | TGGTGTAGAAATACTCCTTGATGTG     |
| Human <i>IFNA</i>    | AGCCCAAGGTTTCAGAGTCACCCA      | TGTATGTGGGTAGGAGATGGAGAT      |
| Human <i>IFNB</i>    | AAGAGTTACACTGCCTTTGCCATC      | AAAGCAAAGGGCGAGGCCATCGT       |
| Human <i>IFNL2/3</i> | CCGGCTCCAGGAGGCCCAAAAA        | CAGGTTGCATGACTGGTGGGAGGG      |
| (+)-strand hRV1B     | AGTCCTCCGGCCCCTGAATG          | AAAGTAGTTGGTCCATCCCGC         |

HPRT = Hypoxanthine-guanine phosphoribosyltransferase

GAPDH = Glyceraldehyde-3-phosphate dehydrogenase
