# Supplementary material for: Toll-like receptor 7 governs interferon and inflammatory responses to rhinovirus and is suppressed by IL-5-induced lung eosinophilia
Source: PubMed Central journal article supplement (PMC4552894; doi:10.1136/thoraxjnl-2014-205465), 2015-06-24
Supplement: thoraxjnl-2014-205465-s3.pdf [file thoraxjnl-2014-205465-s3.pdf]

**Supplementary Table 2 online: Characteristics of healthy and asthmatic subjects.**

|                                                      | Healthy       | Asthmatic     |
|------------------------------------------------------|---------------|---------------|
| <i>N</i>                                             | 13            | 20            |
| Age (years)                                          | 50.8 (26, 69) | 57.8 (30, 77) |
| Males, n (%)                                         | 6 (46.2)      | 4 (25)        |
| Non-smoker, n (%)                                    | 13 (100)      | 17 (85)       |
| FEV <sub>1</sub> % predicted                         | 98.4 ± 4.1    | 67.4 ± 5.4*** |
| ICS, n (%)                                           | 0 (0)         | 20 (100)      |
| Mean ICS dose –<br>(µg, Beclometasone<br>equivalent) | 0             | 505.26        |
| LABA, n (%)                                          | 0 (0)         | 20 (100)      |
| OCS, n (%)                                           | 0 (0)         | 1 (7.1)       |

\*\*\*,  $P < 0.001$
